# Supplementary material for: Adaptation in structured populations and fuzzy boundaries between hard and soft sweeps
Source: PubMed Central journal article supplement (PMC6872172; doi:10.1371/journal.pcbi.1007426), 2019-11-11

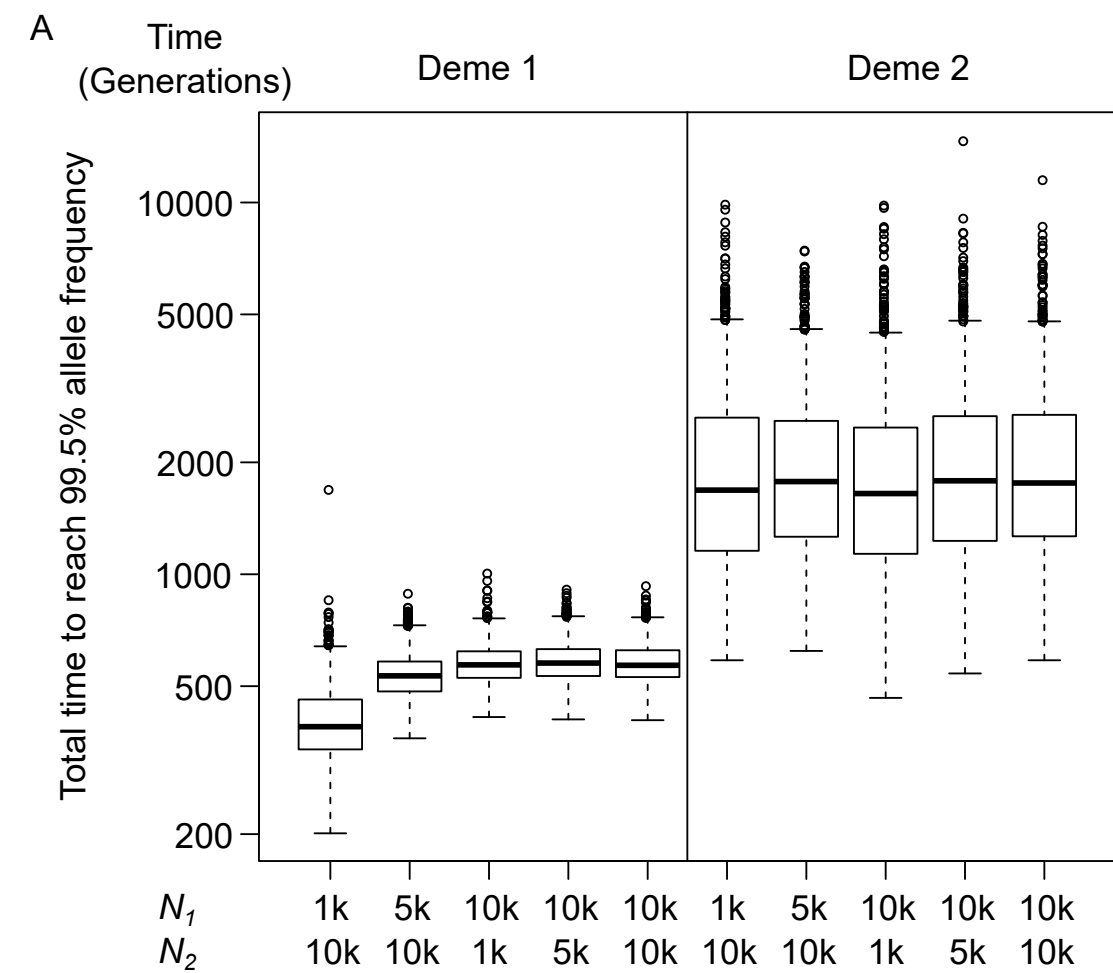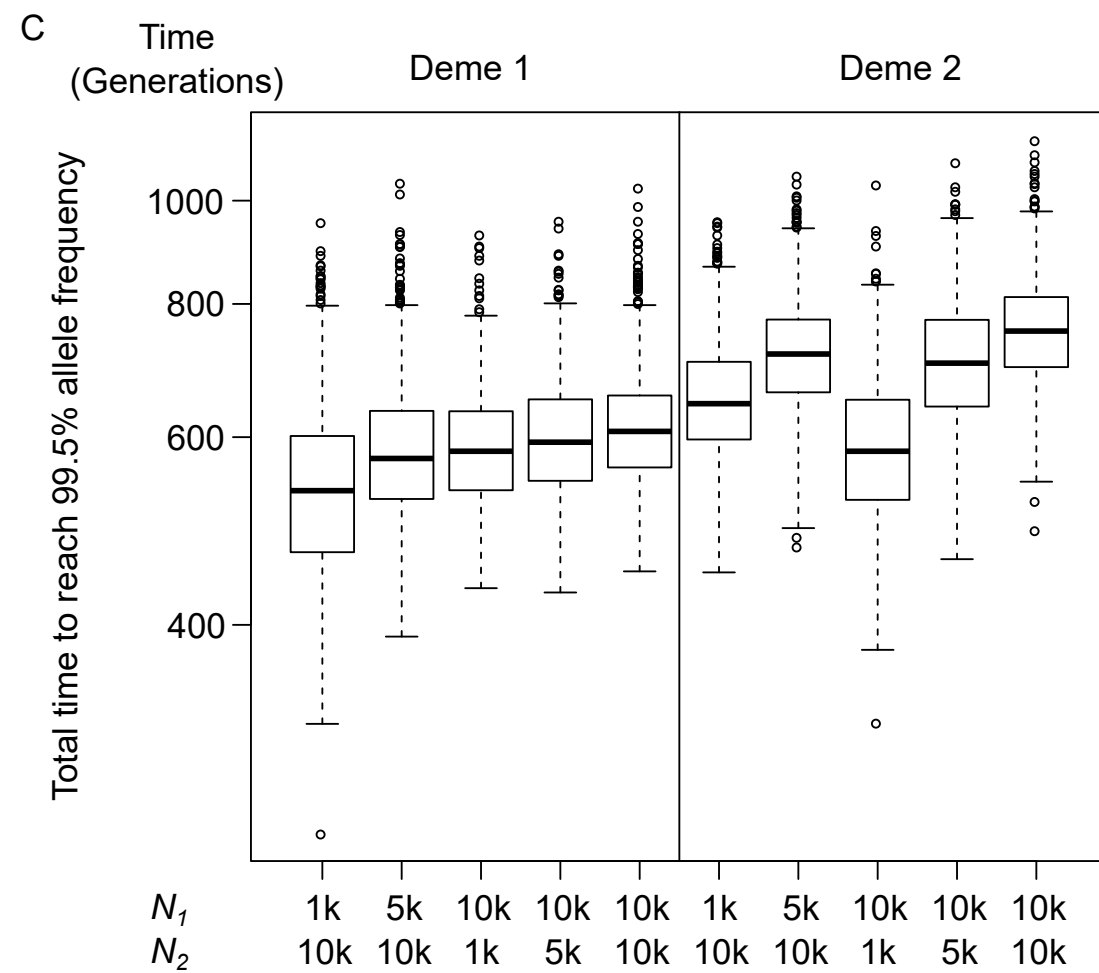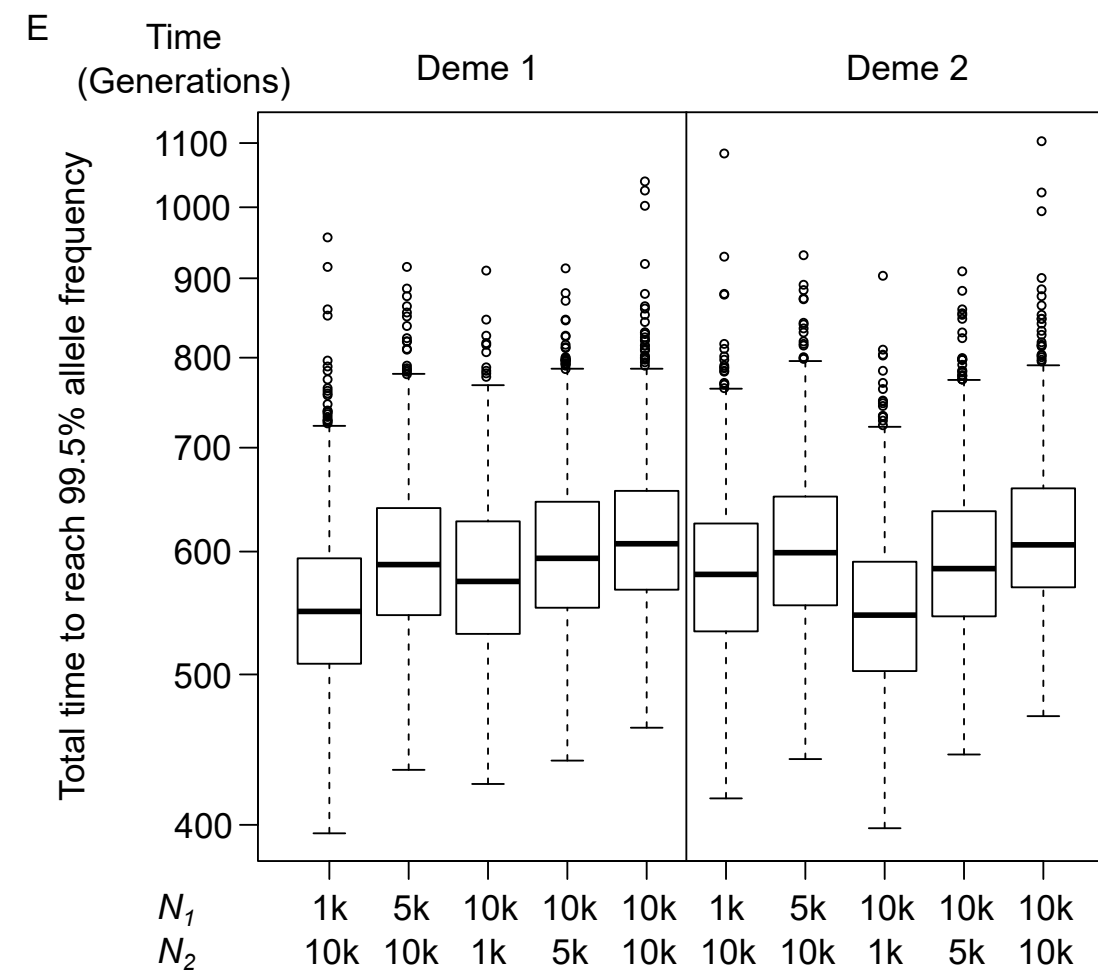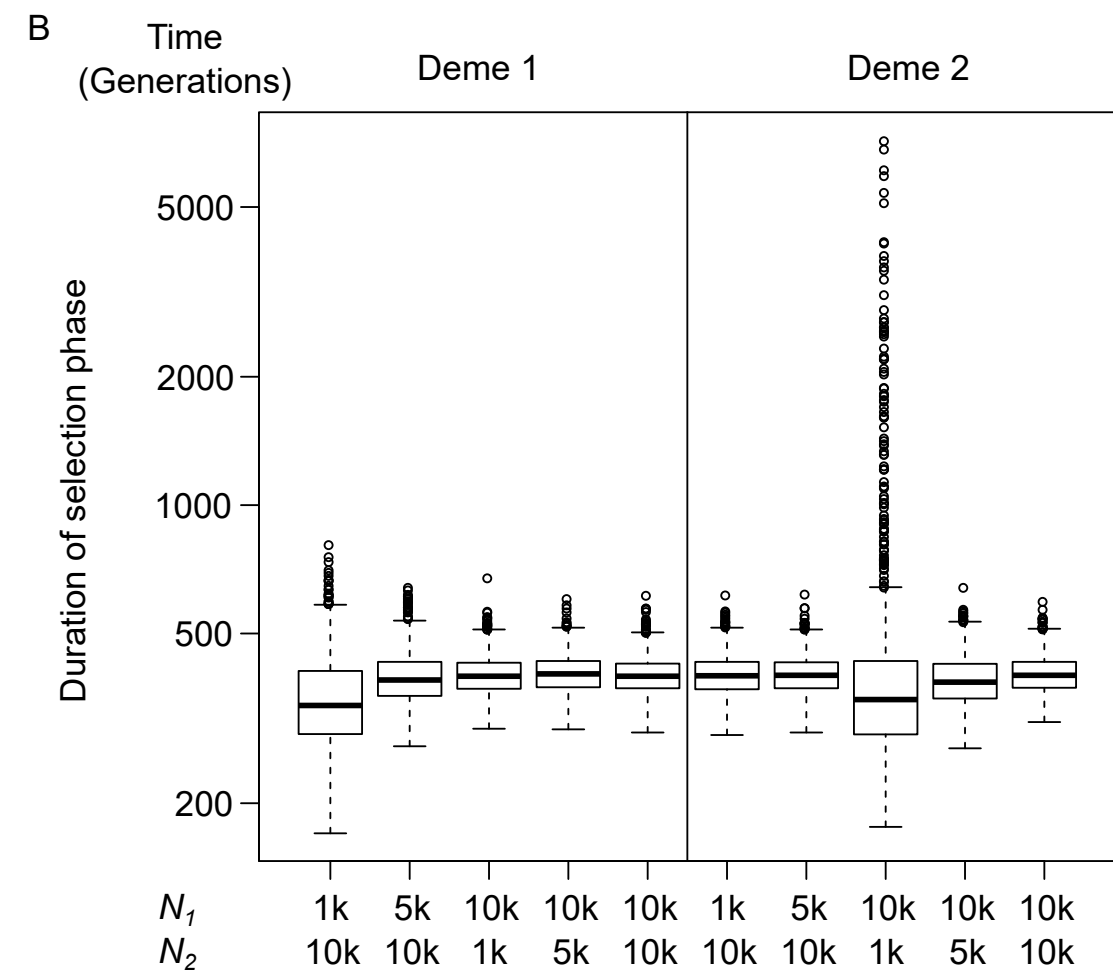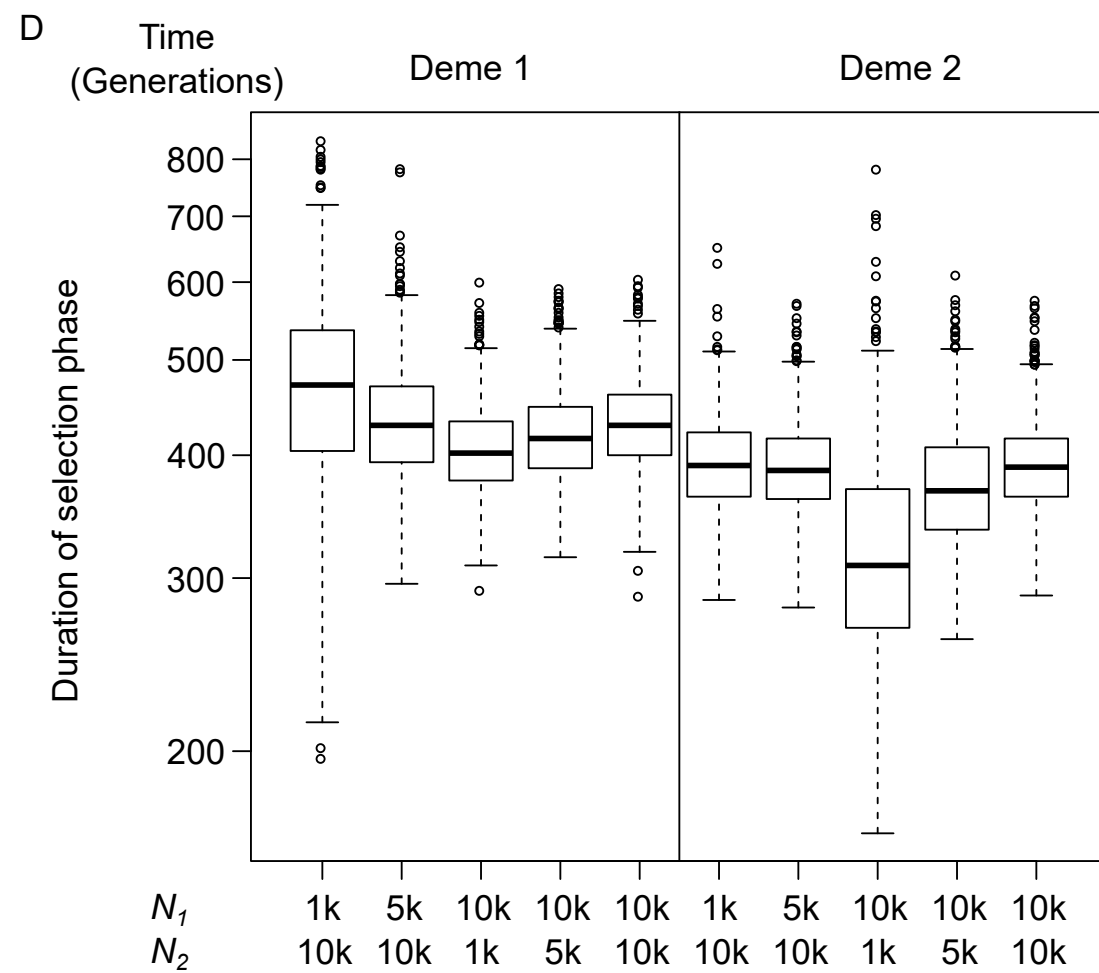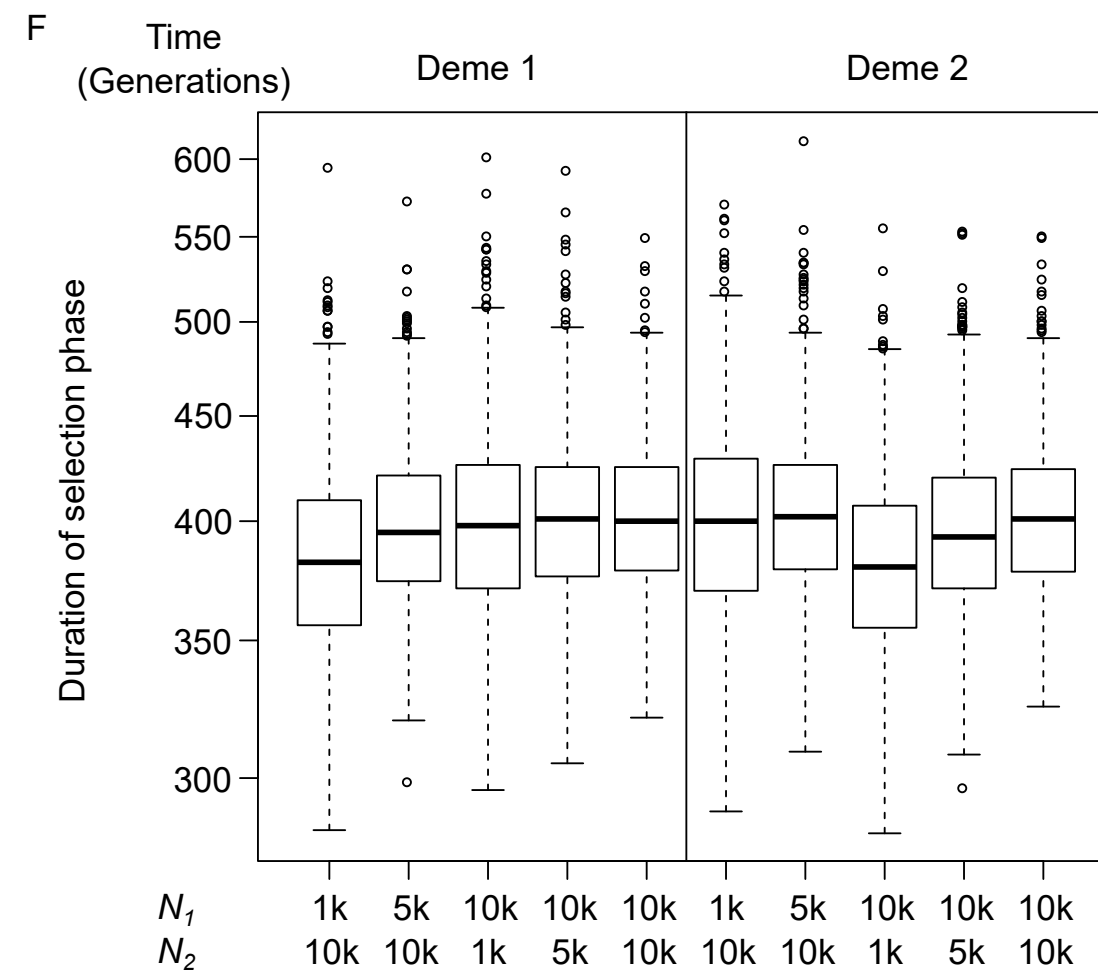

Supplement: pcbi.1007426.s004.pdf [file pcbi.1007426.s004.pdf]
