# Supplementary material for: Adaptation in structured populations and fuzzy boundaries between hard and soft sweeps
Source: PLOS journal article supplement (doi:10.1371/journal.pcbi.1007426), 2019-11-11

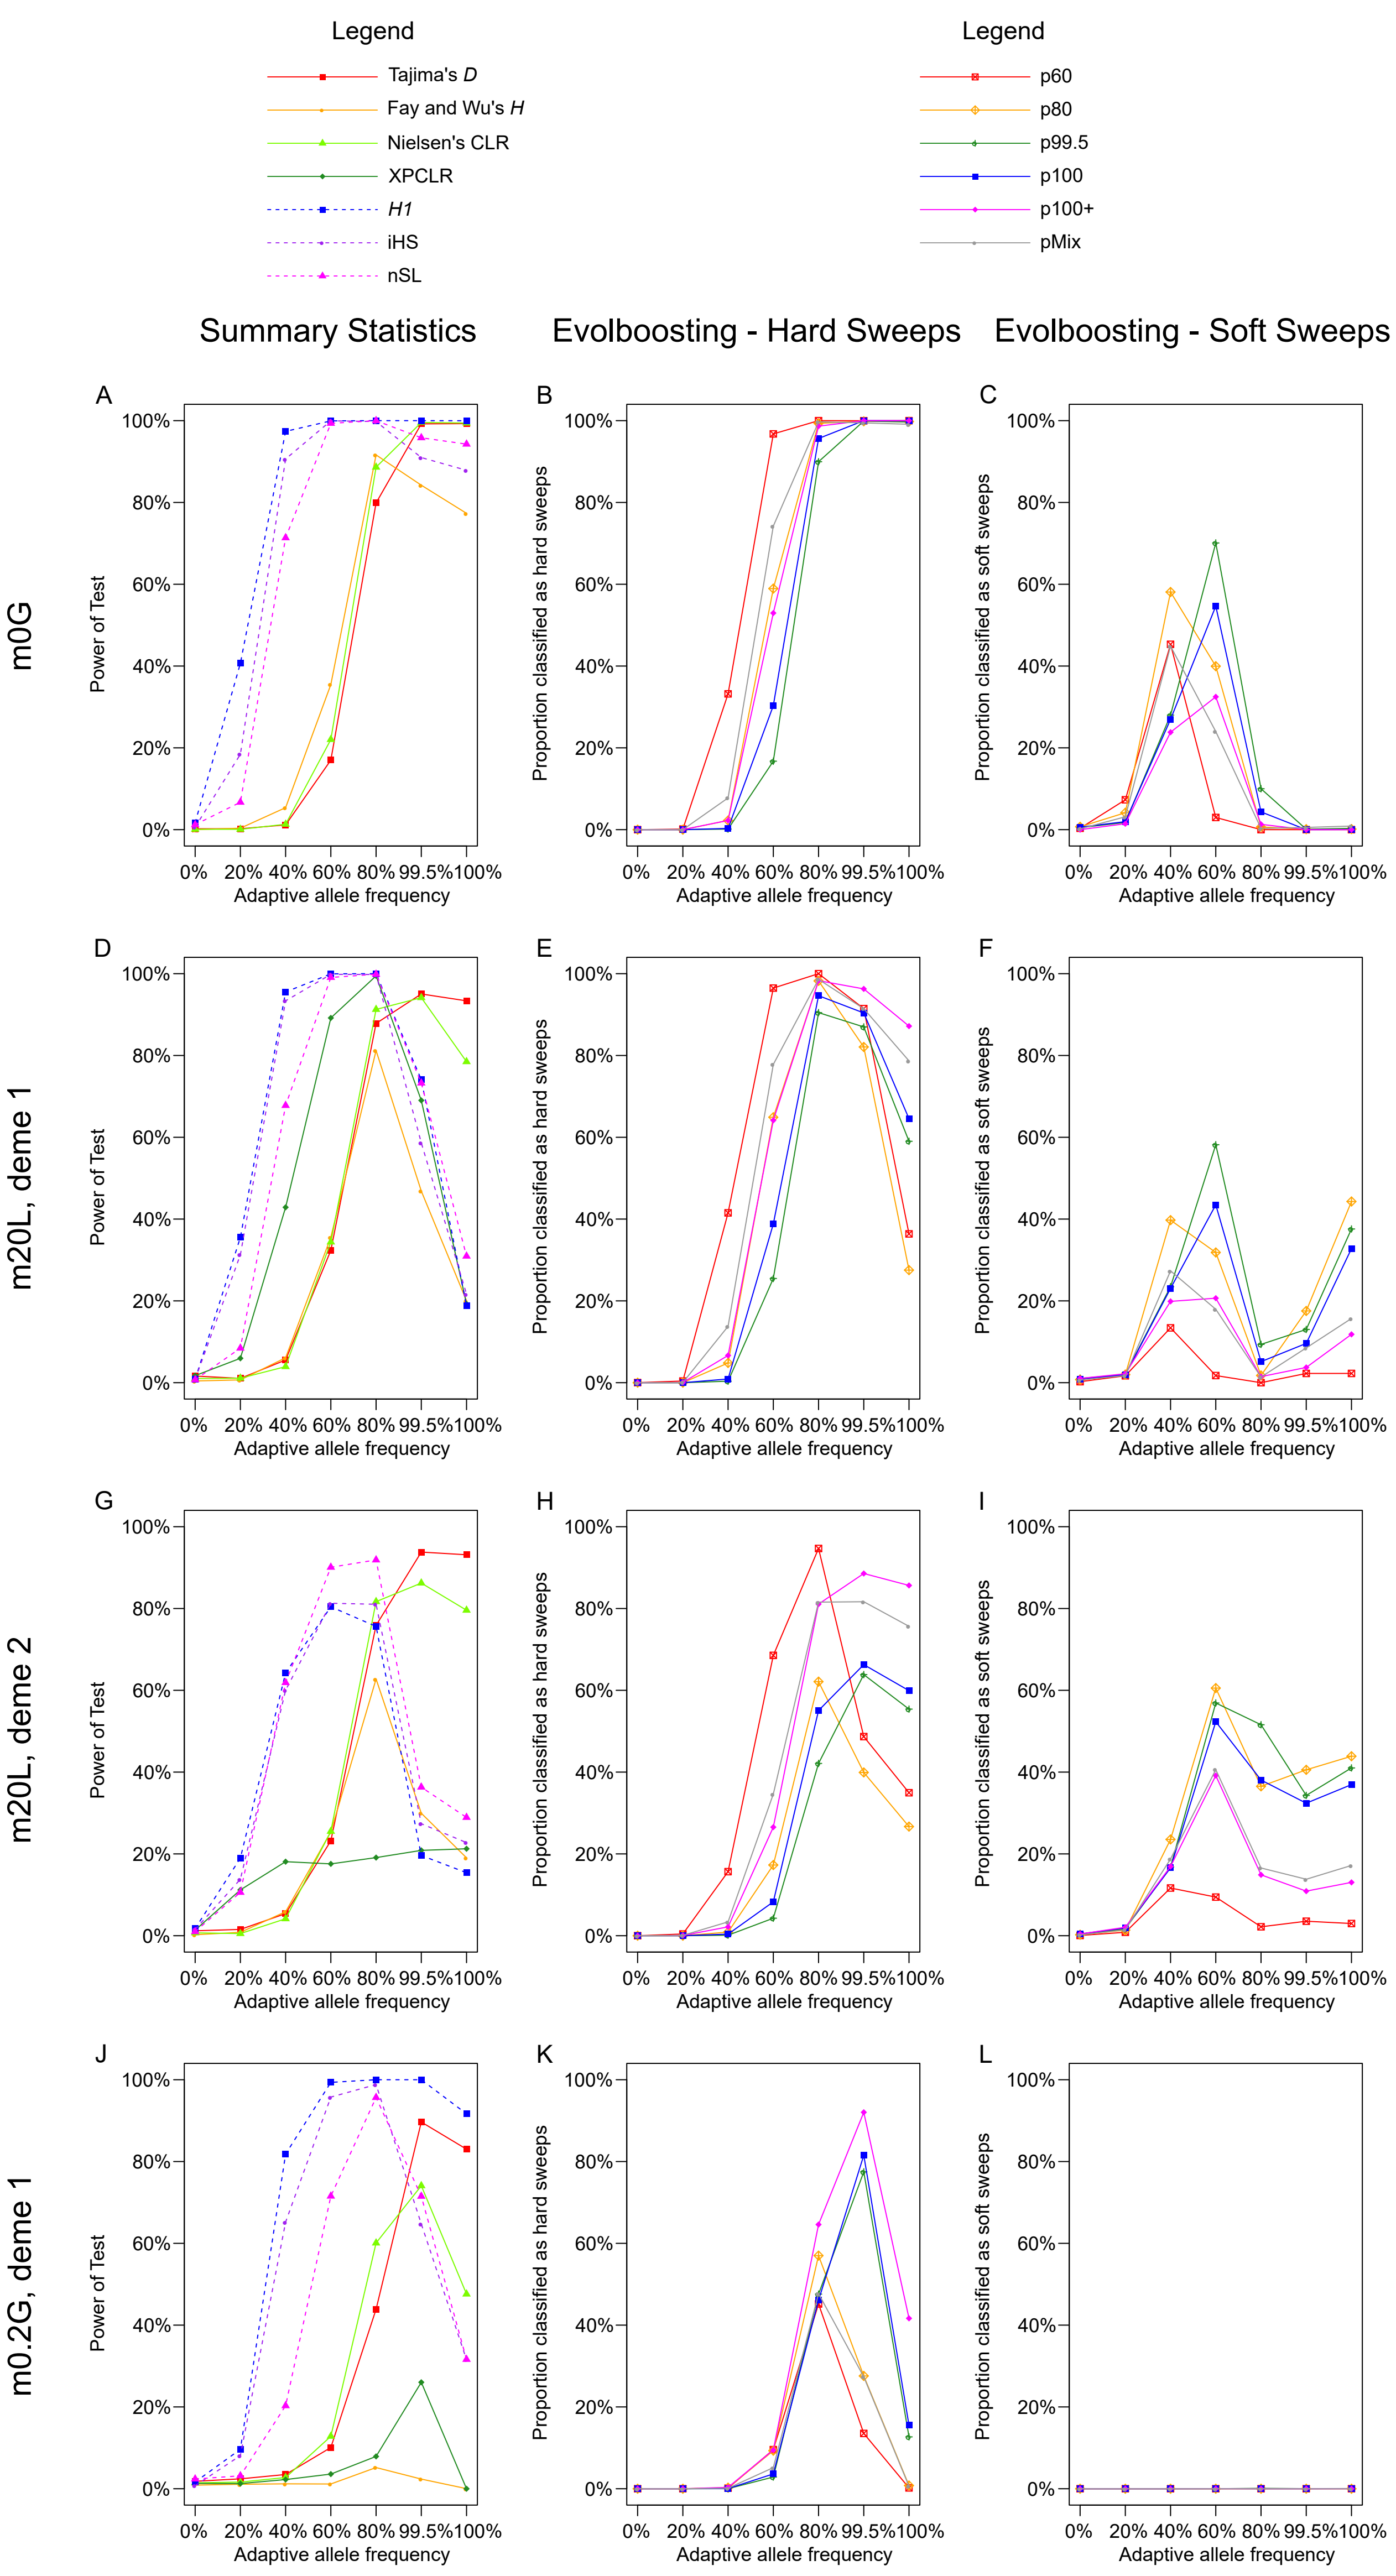

Supplement: S6 (10.1371/journal.pcbi.1007426.s006) [file journal.pcbi.1007426.s006]
